# Supplementary material for: Cell differentiation trajectory predicts patient potential immunotherapy response and prognosis in gastric cancer
Source: publisher site journal article supplement (doi:10.18632/aging.202515), 2021-02-17
Supplement: Supplementary file [file aging-v13i4-202515-supplementary-material-SD1.pdf]

## SUPPLEMENTARY FIGURES

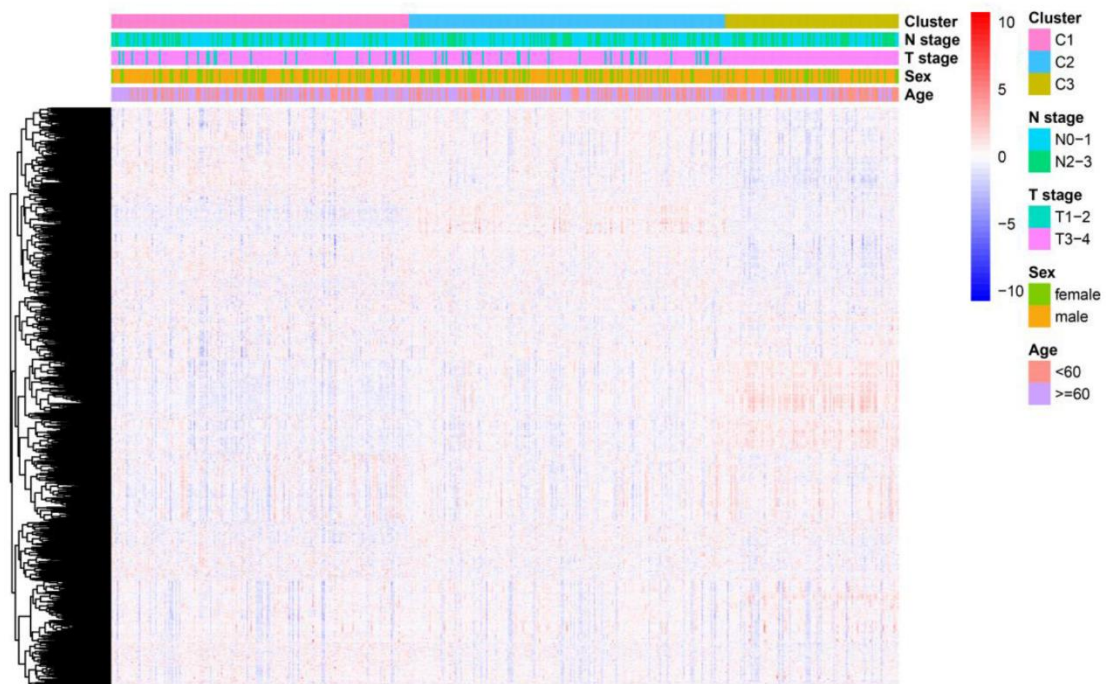

**Supplementary Figure 1. Clustering heat map based on the GSE84437 dataset.** The expression level of GDRGs and the proportion of clinicopathologic features in three molecular subtypes. GDRG: gastric cancer differentiation-related gene.

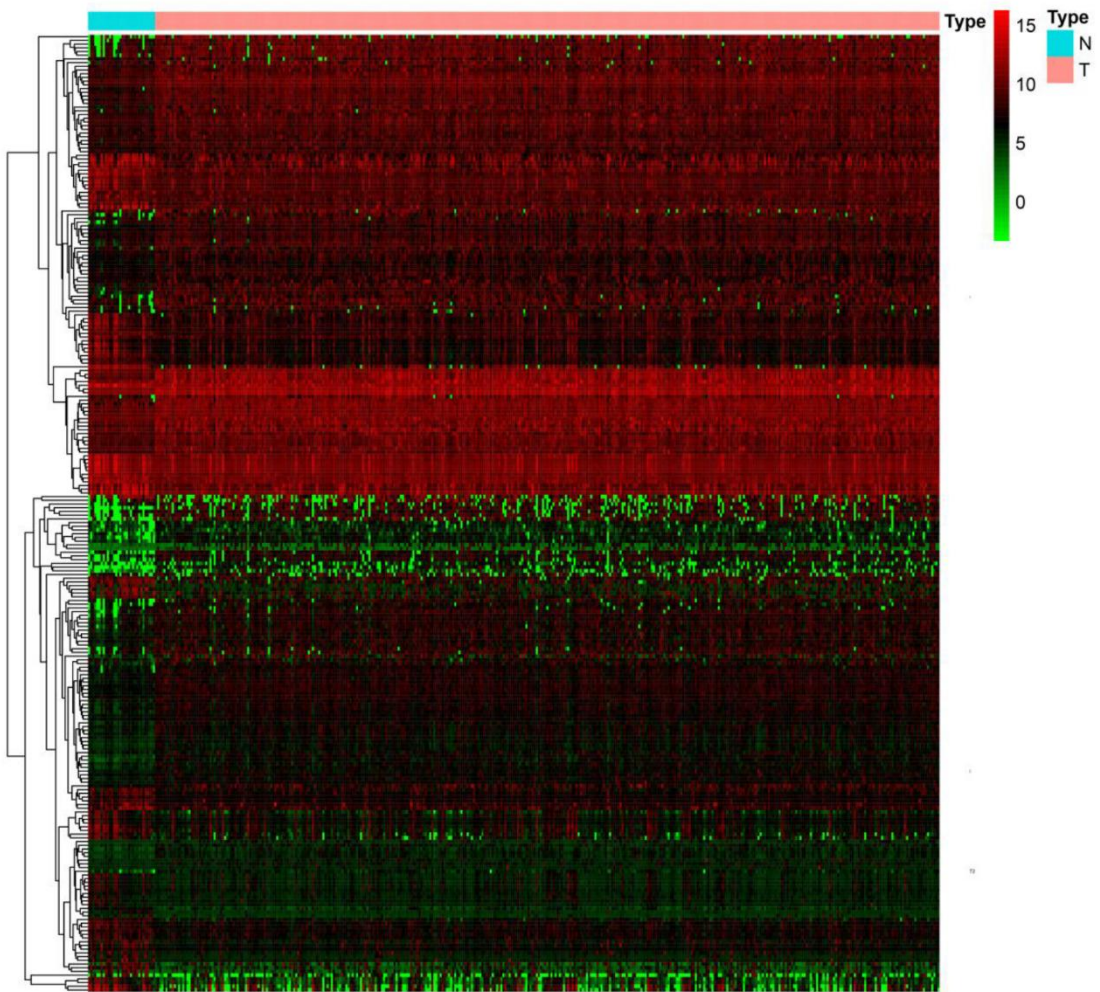

**Supplementary Figure 2. Differentially expressed GDRGs based on the TCGA cohort.** There were 258 differentially expressed genes between normal and GC samples. TCGA: The Cancer Genome Atlas, GDRG: gastric cancer differentiation-related gene.
